# Supplementary material for: Aging-Induced Trap Evolution and Breakdown Strength in LDPE: Numerical Modelling Approach
Source: Research Square preprint supplement (doi:10.21203/rs.3.rs-7098548/v1), 2025-07-15
Supplement: Supplementary file 1 [file eb3dcbf9d5002cf3610d7a6c.docx]

**Supplementary material**

**Note A. Details of Numerical Analysis Model.**

**Table S1**. Parameters for numerical analysis: bipolar charge transport (BCT) model

| Parameter | | Unit | Values | References |
| --- | --- | --- | --- | --- |
|  | Voltage ramp rate | V/s | 500V/s |  |
| εr | Relative permittivity | - | 2.35 | 2.3-2.35  [1], [7], [8] |
|  | Injection barrier height (anode) | eV | 1.13 | 1.1~1.29  [2]-[8] |
|  | Injection barrier height (cathode) | eV | 1.13 |
|  | Mobility (electron) x10-15 | m2/V | 6.17 | 0.8~30x10-15  [2], [3], [6], [8] |
|  | Mobility (hole) x10-15 | m2/V | 6.17 |
| NT | Deep trap density (electron) | Cm-3 | 100 | 100~169  [2]-[4], [6]-[8] |
| NT | Deep trap density (hole) | Cm-3 | 100 |
| ET | Deep trap energy (electron) | eV | 0.987 | 0.93~1.00  [2], [3], [7], [8] |
| ET | Deep trap energy (hole) | eV | 0.987 |
|  | Relaxation time for the molecular chain  x10-10 | s | 1.2 | 2.23  [9] |

[1] Fleming, R. J., et al. "Electrical conductivity and space charge in LDPE containing TiO/sub 2/nanoparticles." IEEE Transactions on Dielectrics and Electrical Insulation 12.4 (2005): 745-753.

[2] Kim, Minhee, Su-Hun Kim, and Se-Hee Lee. "Numerical prediction of DC breakdown characteristics in LDPE with current profile as critical index." *IEEE Access* 8 (2020): 200051-200062.

[3] Min, Daomin, Shengtao Li, and Yoshimichi Ohki. "Numerical simulation on molecular displacement and DC breakdown of LDPE." IEEE Transactions on Dielectrics and Electrical Insulation 23.1 (2016): 507-516.

[4] Takada, Tatsuo, et al. "Quantum chemical calculation studies on interface charge transfer between electrode and polyethylene under electrical stress." Proceedings of 2014 International Symposium on Electrical Insulating Materials. IEEE, 2014.

[5] Lv, Zepeng, et al. "Estimation of charge injection at Al/LDPE interface based on space charge and external current measurement." Applied Physics Letters 123.17 (2023).

[6] Wu, Jiandong, et al. "Simulation of space charge behavior in LDPE with a modified of bipolar charge transport model." Proceedings of 2014 International Symposium on Electrical Insulating Materials. IEEE, 2014.

[7] Banda, M. E., et al. "Bipolar charge transport model to estimate charging and degradation processes in electron-beam-irradiated LDPE films." Journal of Physics D: Applied Physics 53.8 (2019): 085503.

[8] Hoang, Anh T., Yuriy V. Serdyuk, and Stanislaw M. Gubanski. "Charge transport in LDPE nanocomposites part II—Computational approach." Polymers 8.4 (2016): 103.

[9] Tzimas, A., M. Fu, and L. A. Dissado. "Characterization of thermally aged XLPE cable peelings through space charge measurements." *CEIDP'05. 2005 Annual Report Conference on Electrical Insulation and Dielectric Phenomena, 2005.*. IEEE, 2005.
